# Supplementary material for: A novel Co(OH)2/Cu2O nanocomposite-activated peroxydisulfate for the enhanced degradation of tetracycline
Source: Royal Society of Chemistry journal article supplement (doi:10.1039/d1nj02307a), 2021-01-01
Supplement: d1nj02307a1.pdf [file d1nj02307a1.pdf]

## Supporting Information

A novel of  $\text{Co}(\text{OH})_2/\text{Cu}_2\text{O}$  nanocomposite activated peroxydisulfate for enhanced degradation of tetracycline

**Xue Meng<sup>a, b</sup>, Li Yan<sup>a, \*</sup>, Maobin Wei<sup>b, c, \*</sup>, Tao Wang<sup>d</sup>, Ting Xu<sup>c</sup>, Yongsheng Yan<sup>d, \*</sup>, Shihan Cheng<sup>a</sup>**

*<sup>a</sup> Key Laboratory of Preparation and Applications of Environmental Friendly Materials, Ministry of Education, Jilin Normal University, Changchun, 130013, China*

*<sup>b</sup> Key Laboratory of Functional Materials Physics and Chemistry of the Ministry of Education, Jilin Normal University, Changchun, 130013, PR China*

*<sup>c</sup> National Demonstration Center for Experimental Physics Education, Jilin Normal University, Siping, 136000, PR China*

*<sup>d</sup> School of Chemistry and Chemical Engineering, Jiangsu University, Jiangsu University, 212013 Zhenjiang, PR China*

\* Corresponding authors.

E-mail addresses: [yanli820618@163.com](mailto:yanli820618@163.com) (L. Yan), [jlsdzccw@126.com](mailto:jlsdzccw@126.com) (M. Wei), [yys@mail.ujs.edu.cn](mailto:yys@mail.ujs.edu.cn) (Y. Yan).

### Material characterization

The surface morphology of the catalyst was observed by scanning electron microscopy (SEM, IEOL JSM-7800F) and transmission electron microscopy (TEM, FEI TECNAI F20). The crystal structure of the catalyst was characterized by X-ray diffraction, (XRD, D/max250PC, Rigaku), X-ray photoelectron spectroscopy (XPS) was performed using an X-ray photoelectron spectrometer (ESCALAB 250Xi A1440, Thermo Scientific). Fourier transform infrared (FTIR) spectra were obtained by (Nicolet-380 FTIR) spectrophotometer. Brunauer-Emmett-Teller (BET) method was used to determine the specific surface area and pore size distribution of the catalyst.

Table S1 Comparison of element changes in  $\text{Co}(\text{OH})_2/\text{Cu}_2\text{O}$  catalyst by EDS analysis

|     | Actual atomic ration |       |       | Theoretical atomic ratio |       |       |
|-----|----------------------|-------|-------|--------------------------|-------|-------|
|     | Cu                   | Co    | O     | Cu                       | Co    | O     |
| 0.1 | 61.38                | 3.21  | 35.41 | 60.60                    | 3.03  | 36.37 |
| 0.5 | 41.47                | 12.26 | 46.27 | 44.44                    | 11.11 | 44.45 |
| 0.7 | 40.40                | 12.84 | 46.76 | 39.21                    | 13.73 | 47.06 |
| 1   | 31.76                | 17.23 | 51.01 | 33.33                    | 16.67 | 50.00 |

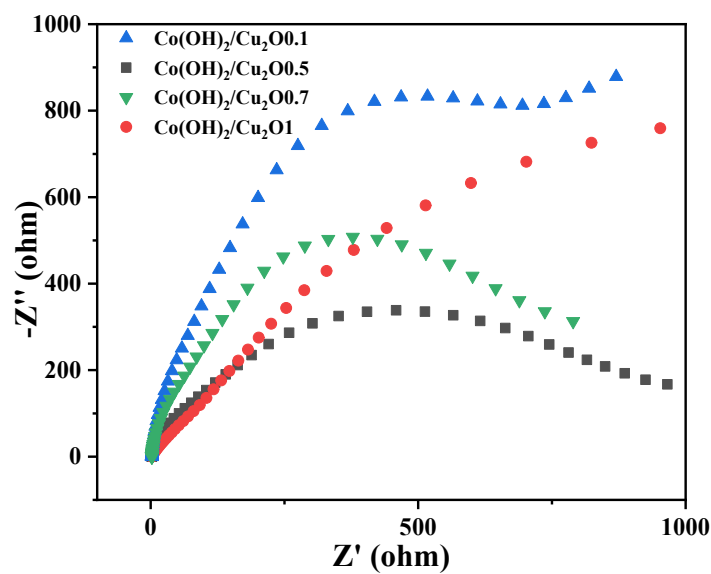

Fig. S1 EIS Nyquist plots of  $\text{Co}(\text{OH})_2/\text{Cu}_2\text{O}0.1$ ,  $\text{Co}(\text{OH})_2/\text{Cu}_2\text{O}0.5$ ,  $\text{Co}(\text{OH})_2/\text{Cu}_2\text{O}0.7$  and  $\text{Co}(\text{OH})_2/\text{Cu}_2\text{O}1$ .

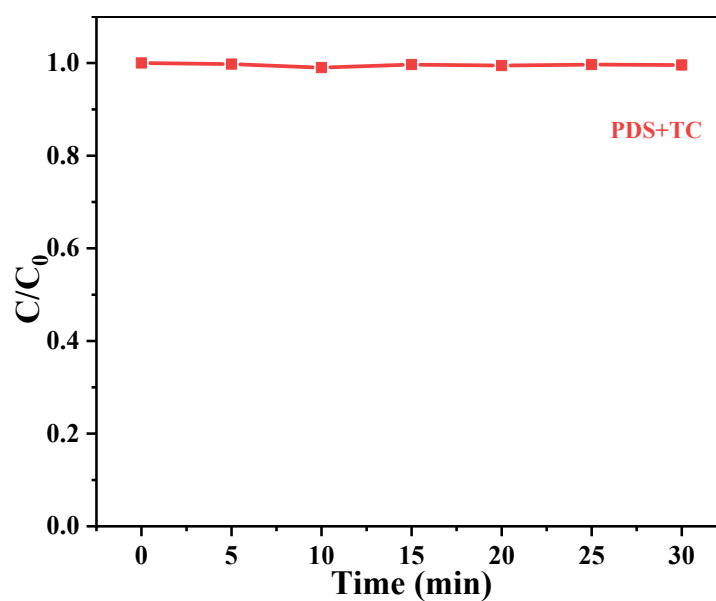

Fig. S2 Blank experiment without catalysts.

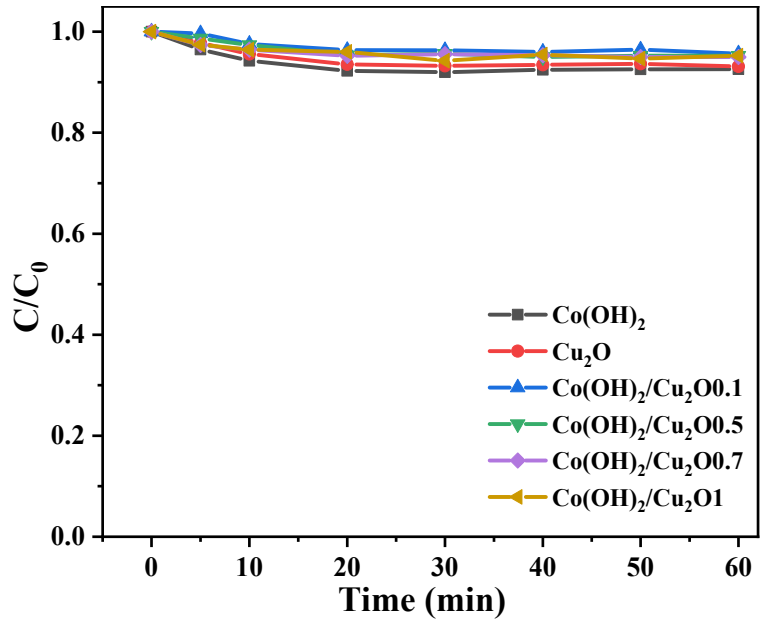

Fig. S3 Adsorption experiments to TC over different samples.

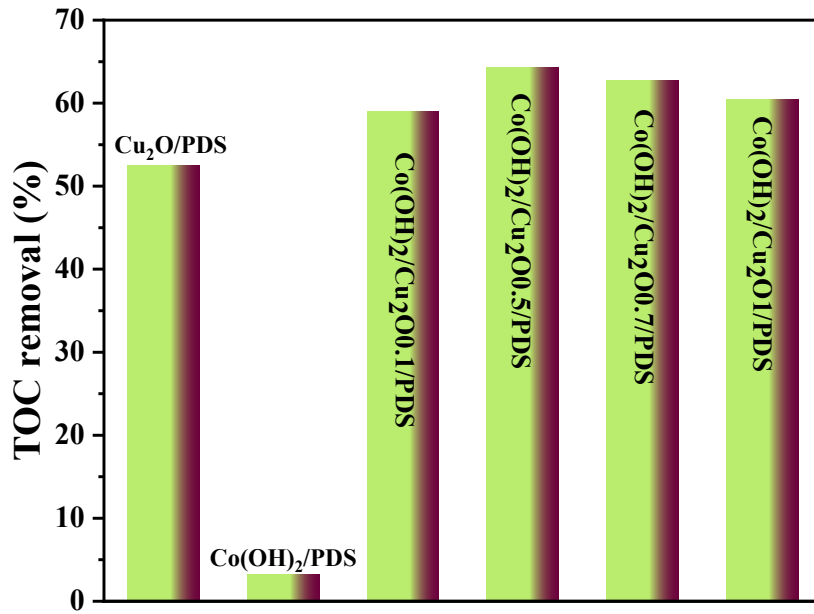

Fig. S4 TOC removal rate over different degradation system.

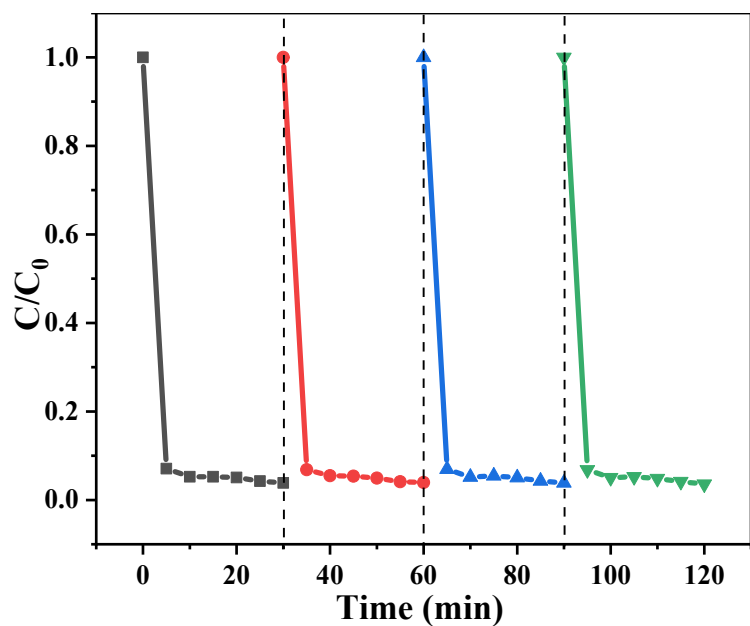

Fig. S5 Recycle experiments for TC degradation in  $\text{Co}(\text{OH})_2/\text{Cu}_2\text{O}/\text{PDS}$  system.

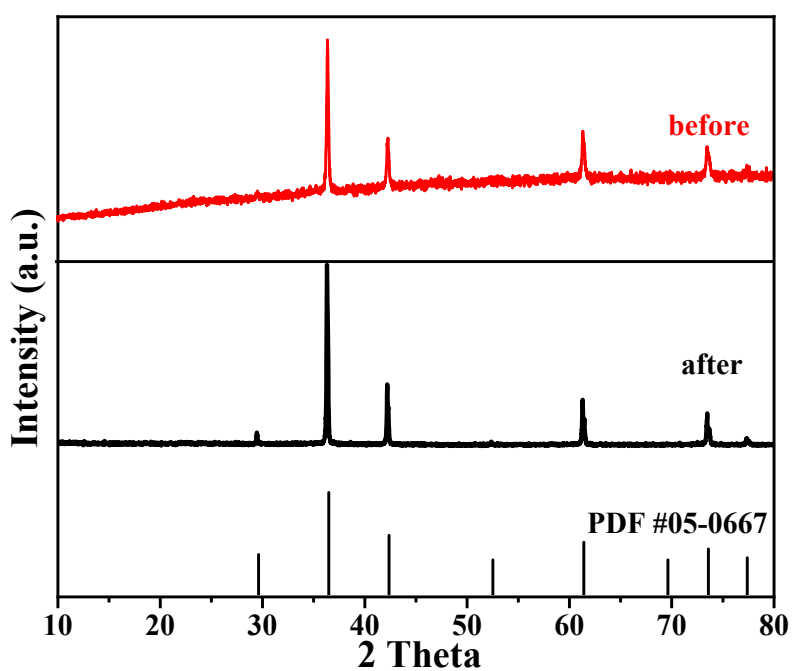

Fig. S6 XRD patterns of  $\text{Co}(\text{OH})_2/\text{Cu}_2\text{O}_{0.5}$  before and after degradation reaction.

Table S2 Comparison with reported works of other catalyst systems

| Catalyst                         | Reaction conditions                        | Time (min) | Removal efficiency | Ref. |
|----------------------------------|--------------------------------------------|------------|--------------------|------|
| $\text{Cu}_2\text{O}/\text{FNC}$ | [PMS] = 2 mmol/L;<br>[catalyst] = 0.1 g/L; | 60         | 95%                | 1    |

|                                        |                                                    |     |       |                      |
|----------------------------------------|----------------------------------------------------|-----|-------|----------------------|
|                                        | [FNC] = 20 mg/L                                    |     |       |                      |
|                                        | [PDS] = 5 $\mu$ M;                                 |     |       |                      |
| CuO                                    | [catalyst] = 200 mg/L;<br>[2,4-DCP] = 5 Mm         | 60  | 40%   | 2                    |
| Cu <sub>2</sub> O/Au                   | [catalyst] = 0.1 g/L;<br>[methyl orange] = 15 mg/L | 60  | 74%   | 3                    |
|                                        | [PMS] = 1 g/L;                                     |     |       |                      |
| CuO/MnFeO <sub>4</sub>                 | [catalyst] = 1 g/L;<br>[LEV] = 5 mg/L              | 120 | 92.3% | 4                    |
|                                        | [PMS]= 1 g/L;                                      |     |       |                      |
| CuFeO <sub>2</sub>                     | [catalyst] = 1 g/L;<br>[LEV] = 5 mg/L              | 60  | 80%   | 5                    |
|                                        | [PDS] = 30 mg/L;                                   |     |       |                      |
| Co(OH) <sub>2</sub> /Cu <sub>2</sub> O | [catalyst] = 0.5 g/L;<br>[TC] = 10 mg/L            | 30  | 98%   | <b>This<br/>work</b> |

## References

- 1 N. Zhang, E. P. Tsang, K. Wang, J. Fang, Y. Li, G. Zhou and Z. Fang, *Sci. Total Environ.*, 2021, **764**, 142813.
- 2 Y. Cho, R. Lin and Y. Lin, *Sci. Total Environ.*, 2020, **699**, 134379.
- 3 G. Z. Yuan, C. F. Hsia, Z. W. Lin, C. Chiang, Y. W. Chiang and M. H. Huang, *Chemistry*, 2016, **22**, 12548-12556.
- 4 Q. Ma, H. Zhang, X. Zhang, B. Li, R. Guo, Q. Cheng and X. Cheng, *Chem. Eng. J.*, 2019, **360**, 848-860.
- 5 J. Lyu, M. Ge, Z. Hu and C. Guo, *Chem. Eng. J.*, 2020, **389**.
